# Supplementary material
Source: PubMed Central journal article supplement (PMC5797324)

**Supplementary Table S1. Summary of Significant Effects of Genetic Polymorphisms, Cannabis, and Hemisphere on Hippocampal Subregional Volumes**

| COMT (df = 1,54, 1,56) <sup>a,b</sup> | CB <sup>b</sup>                     | COMT                | CB × COMT                  | Hemisphere                        | CB × hemisphere            | Hemisphere × COMT          | Hemisphere × CB × COMT      | Hemisphere × ICV   |
|---------------------------------------|-------------------------------------|---------------------|----------------------------|-----------------------------------|----------------------------|----------------------------|-----------------------------|--------------------|
| Total hippocampus                     | F = 0.64, p = 0.43                  | F = 1.29, p = 0.28  | F = 0.74, p = 0.48         | F = 0.70, p = 0.41                | F = 0.94, p = 0.34         | F = 0.07, p = 0.93         | F = 1.25, p = 0.30          | F = 1.17, p = 0.28 |
| Subiculum <sup>c</sup>                | F = 1.61, p = 0.21                  | F = 0.02, p = 0.88  | F = 0.03, p = 0.86         | F = 0.18, p = 0.67                | F = 4.16, p = 0.05         | F = 0.58, p = 0.45         | F = 1.90, p = 0.17          | F = 0.21, p = 0.65 |
| Presubiculum <sup>c</sup>             | F = 0.19, p = 0.67                  | F = 0.001, p = 0.97 | F = 0.16, p = 0.97         | F = 2.16, p = 0.15                | F = 2.17, p = 0.15         | F = 0.16, p = 0.69         | F = 2.00, p = 0.16          | F = 1.17, p = 0.15 |
| CA1 <sup>c</sup>                      | <b>F = 3.95, p = 0.05,</b><br>CB>HC | F = 0.45, p = 0.51  | F = 0.21, p = 0.65         | F = 0.04, p = 0.85                | F = 0.59, p = 0.45         | F = 0.25, p = 0.62         | F = 0.31, p = 0.58          | F = 0.00, p = 0.99 |
| CA2/3 <sup>c</sup>                    | <b>F = 5.14, p = 0.03,</b><br>CB>HC | F = 0.08, p = 0.78  | F = 0.003, p = 0.96        | F = 0.28, p = 0.60                | F = 1.85, p = 0.18         | F = 0.17, p = 0.68         | F = 0.27, p = 0.60          | F = 0.22, p = 0.64 |
| CA4 <sup>c</sup>                      | <b>F = 4.44, p = 0.04,</b><br>CB>HC | F = 0.18, p = 0.67  | F = 0.40, p = 0.53         | F = 0.17, p = 0.69                | F = 2.77, p = 0.10         | F = 0.22, p = 0.64         | F = 0.45, p = 0.50          | F = 0.11, p = 0.74 |
| Fimbria <sup>c</sup>                  | F = 2.78, p = 0.10                  | F = 2.25, p = 0.14  | F = 0.01, p = 0.92         | F = 0.25, p = 0.62                | F = 0.00, p = 0.99         | F = 0.21, p = 0.65         | F = 0.01, p = 0.94          | F = 0.09, p = 0.77 |
| Fissure <sup>c</sup>                  | F = 1.87, p = 0.18                  | F = 1.54, p = 0.22  | F = 3.61, p = 0.06         | F = 3.03, p = 0.09                | <b>F = 8.92, p = 0.004</b> | F = 0.06, p = 0.80         | <b>F = 5.15, p = 0.03</b>   | F = 3.34, p = 0.07 |
| DAT1 (df = 1,48, 1,52) <sup>a,b</sup> | CB                                  | DAT1                | CB × DAT1                  | Hemisphere                        | CB × hemisphere            | Hemisphere × DAT1          | Hemisphere × CB × DAT1      | Hemisphere × ICV   |
| Total hippocampus                     | F = 0.43, p = 0.51                  | F = 0.4, p = 0.29   | <b>F = 4.93, p = 0.03</b>  | F = 0.70, p = 0.41                | F = 3.70, p = 0.06         | F = 1.05, p = 0.31         | F = 3.17, p = 0.08          | F = 1.17, p = 0.29 |
| Subiculum                             | F = 0.30, p = 0.59                  | F = -0.52, p = 0.72 | F = 0.27, p = 0.77         | F = 0.001, p = 0.98               | F = 0.41, p = 0.52         | F = 1.13, p = 0.36         | F = 0.44, p = 0.65          | F = 0.02, p = 0.89 |
| Presubiculum                          | F = 1.20, p = 0.28                  | F = 0.27, p = 0.89  | F = 0.88, p = 0.42         | <b>F = 4.10, p = 0.05,</b><br>L<R | F = 0.75, p = 0.39         | F = 1.66, p = 0.18         | F = 0.06, p = 0.94          | F = 3.11, p = 0.08 |
| CA1                                   | F = 1.52, p = 0.22                  | F = 2.25, p = 0.08  | F = 0.70, p = 0.50         | F = 0.04, p = 0.84                | F = 0.01, p = 0.91         | F = 1.10, p = 0.37         | F = 0.12, p = 0.89          | F = 0.04, p = 0.84 |
| CA2/3                                 | F = 1.68, p = 0.20                  | F = 1.25, p = 0.30  | F = 0.50, p = 0.61         | F = 0.04, p = 0.84                | F = 0.15, p = 0.70         | F = 1.15, p = 0.34         | F = 0.23, p = 0.80          | F = 0.12, p = 0.74 |
| CA4                                   | F = 1.28, p = 0.26                  | F = 1.49, p = 0.22  | F = 0.18, p = 0.84         | F = 0.04, p = 0.85                | F = 0.51, p = 0.48         | F = 0.95, p = 0.44         | F = 0.06, p = 0.94          | F = 0.08, p = 0.78 |
| Fimbria                               | F = 2.71, p = 0.11                  | F = 1.80, p = 0.15  | F = 0.33, p = 0.72         | F = 0.10, p = 0.75                | F = 0.01, p = 0.91         | F = 0.75, p = 0.57         | F = 0.07, p = 0.94          | F = 0.05, p = 0.82 |
| Fissure                               | F = 0.23, p = 0.63                  | F = .25, p = 0.91   | <b>F = 4.05, p = 0.02</b>  | F = 2.89, p = 0.10                | F = 1.52, p = 0.22         | F = 1.06, p = 0.39         | F = 0.61, p = 0.55          | F = 2.47, p = 0.12 |
| BDNF df = 1,48 <sup>a,b</sup>         | CB                                  | BDNF                | CB × BDNF                  | Hemisphere                        | CB × hemisphere            | Hemisphere × BDNF          | Hemisphere × CB × BDNF      | Hemisphere × ICV   |
| Total hippocampus                     | F = 0.25, p = 0.62                  | F = 0.11, p = 0.74  | F = 0.01, p = 0.91         | F = 0.44, p = 0.51                | <b>F = 4.32, p = 0.04</b>  | F = 0.11, p = 0.75         | F = 0.34, p = 0.56          | F = 0.80, p = 0.38 |
| Subiculum                             | F = 0.76, p = 0.39                  | F = 0.22, p = 0.64  | F = 0.02, p = 0.90         | F = 0.08, p = 0.78                | F = 2.26, p = 0.14         | F = 0.68, p = 0.41         | F = 0.37, p = 0.55          | F = 0.14, p = 0.71 |
| Presubiculum                          | F = 0.07, p = 0.80                  | F = 1.62, p = 0.21  | F = 0.30, p = 0.58         | F = 1.93, p = 0.17                | F = 0.46, p = 0.50         | F = 3.76, p = 0.06         | F = 0.08, p = 0.77          | F = 1.09, p = 0.30 |
| CA1                                   | F = 2.69, p = 0.11                  | F = 0.003, p = 0.95 | F = 0.81, p = 0.37         | F = 0.01, p = 0.94                | F = 0.63, p = 0.43         | F = 1.35, p = 0.25         | F = 0.10, p = 0.76          | F = 0.01, p = 0.95 |
| CA2/3                                 | <b>F = 5.23, p = 0.03,</b><br>CB>HC | F = 0.17, p = 0.68  | F = 0.53, p = 0.47         | F = 0.70, p = 0.41                | F = 2.17, p = 0.15         | F = 0.43, p = 0.52         | F = 0.01, p = 0.93          | F = 0.59, p = 0.45 |
| CA4                                   | F = 2.71, p = 0.11                  | F = 0.15, p = 0.70  | F = 0.18, p = 0.68         | F = 0.43, p = 0.52                | F = 2.48, p = 0.12         | F = 0.98, p = 0.33         | F = 0.003, p = 0.96         | F = 0.34, p = 0.57 |
| Fimbria                               | F = 2.10, p = 0.15                  | F = 0.003, p = 0.96 | F = 0.06, p = 0.81         | F = 0.15, p = 0.70                | F = 0.17, p = 0.69         | F = 3.18, p = 0.08         | F = 0.96, p = 0.33          | F = 0.06, p = 0.81 |
| Fissure                               | F = 0.12, p = 0.74                  | F = 0.64, p = 0.43  | F = 0.03, p = 0.87         | F = 2.53, p = 0.12                | <b>F = 6.01, p = 0.02</b>  | <b>F = 9.11, p = 0.004</b> | F = 0.13, p = 0.72          | F = 2.59, p = 0.11 |
| COMT-DAT1 <sup>b</sup>                | CB                                  | COMT-DAT1           | CB × COMT-DAT1             | Hemisphere                        | CB × hemisphere            | Hemisphere × COMT-DAT1     | Hemisphere × CB × COMT-DAT1 | Hemisphere × ICV   |
| Total hippocampus                     | F = 0.71, p = 0.40                  | F = 1.35, p = 0.27  | F = 1.89, p = 0.16         | F = 0.61, p = 0.44                | F = 1.14, p = 0.29         | F = .95, p = 0.40          | F = 0.30, p = 0.74          | F = 0.92, p = 0.34 |
| Subiculum                             | F = 1.73, p = 0.20                  | F = 0.02, p = 0.98  | F = 0.23, p = 0.79         | F = 0.59, p = 0.45                | F = 0.45, p = 0.51         | F = 0.53, p = 0.59         | F = 0.81, p = 0.45          | F = 0.64, p = 0.43 |
| Presubiculum                          | F = 0.60, p = 0.44                  | F = 0.02, p = 0.98  | F = 0.65, p = 0.53         | F = 4.96, p = 0.03                | F = 3.57, p = 0.07         | F = 0.26, p = 0.77         | F = 1.72, p = 0.19          | F = 3.41, p = 0.07 |
| CA1                                   | F = 1.68, p = 0.20                  | F = 0.29, p = 0.75  | F = 0.82, p = 0.45         | F = 0.74, p = 0.39                | F = 0.32, p = 0.57         | F = 0.61, p = 0.55         | F = 0.92, p = 0.40          | F = 0.41, p = 0.53 |
| CA2/3                                 | F = 2.64, p = 0.11                  | F = 0.11, p = 0.90  | F = 0.22, p = 0.80         | F = 0.38, p = 0.54                | F = 0.32, p = 0.58         | F = 1.42, p = 0.25         | F = 0.05, p = 0.95          | F = 0.26, p = 0.61 |
| CA4                                   | F = 2.18, p = 0.15                  | F = 0.17, p = 0.84  | F = 0.18, p = 0.84         | F = 0.28, p = 0.60                | F = 0.57, p = 0.45         | F = 2.07, p = 0.14         | F = 0.04, p = 0.96          | F = 0.17, p = 0.68 |
| Fimbria                               | F = 0.17, p = 0.68                  | F = 0.76, p = 0.47  | F = 0.79, p = 0.46         | F = 0.82, p = 0.37                | F = 1.77, p = 0.19         | <b>F = 4.39, p = 0.02</b>  | F = 0.50, p = 0.61          | F = 0.41, p = 0.52 |
| Fissure                               | F = 3.35, p = 0.07                  | F = 0.04, p = 0.96  | <b>F = 5.31, p = 0.008</b> | F = 1.89, p = 0.18                | F = 3.23, p = 0.08         | F = 1.63, p = 0.21         | F = 1.32, p = 0.28          | F = 2.21, p = 0.14 |

Bold characters indicate significant effects.

<sup>a</sup>Repeated-measures ANCOVAs with hippocampal volumes as dependent variables, hemisphere as repeated measure, cannabis-using group and genetic polymorphism as fixed factors, and intracranial volume (ICV) as covariate.

<sup>b</sup>COMT, catechol-O-methyltransferase; DAT1, dopamine transporter 1; BDNF, brain-derived neurotrophic factor; COMT-DAT1, COMT × DAT1 cross-product; CB, cannabis group; HC, healthy controls.

<sup>c</sup>Hippocampal subregions include the subiculum, presubiculum, cornu ammonis (CA) subfields CA1, CA2/3, and CA4, fimbria, and hippocampal fissure.

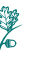

Supplement: Supp_Table1.pdf [file Supp_Table1.pdf]
